# Supplementary material
Source: PubMed Central journal article supplement (PMC3887909)
Supplement: molcell-35-3-243-9-supplementary.pdf [file molcell-35-3-243-9-supplementary.pdf]

Um *et al.*, Supplementary Figure 1

```

Gm10 Ra  FLKGHEDLRQDE RVMQLFGLVNTLLSENS PKTAEKDLS IQRYAVI PL SPNSGLI EWVPNC 2139
Gm10 Fb  FLKGHEDLRQDE RVMQLFGLVNTLLSENS PKTAEKDLS IQRYAVI PL SPNSGLI EWVPNC 2139
At10 R   FLKGHEDLRQDE RVMQLFGLVNTLLSENS PKTAEKDLS IQRYAVI PL SPNSGLI EWVPNC 2123
*****

Gm10 Ra  DTLHLH IREYRDA RKITL NQEHKCM LSEA PDYDHLPLI AKVEVEE HADLNTEGNDLARVIL 2199
Gm10 Fb  DTLHLH IREYRDA RKITL NQEHKCM LSEA PDYDHLPLI AKVEVEE HADLNTEGNDLARVIL 2199
At10 R   DTLHLH IREYRDA RKITL NQEHKCM LSEA PDYDHLPLI AKVEVEE HADLNTEGNDLARVIL 2183
*****

Gm10 Ra  WLKSR TSETWLER RTNYTRS LA VMSMVGYLL GLGDRHP SNLM LHRFS GKILLHID EGDCEE 2259
Gm10 Fb  WLKSR TSETWLER RTNYTRS LA VMSMVGYLL GLGDRHP SNLM LHRFS GKILLHID EGDCEE 2259
At10 R   WLKSR TSETWLER RTNYTRS LA VMSMVGYLL GLGDRHP SNLM LHRFS GKILLHID EGDCEE 2243
*****

Gm10 Ra  ASMNRE KEPEKVP FRITRML VKAMEVSGI EGNFRSTCE NVMQVLR TNKD SVMAMMEAFVH 2319
Gm10 Fb  ASMNRE KEPEKVP FRITRML VKAMEVSGI EGNFRSTCE NVMQVLR TNKD SVMAMMEAFVH 2319
At10 R   ASMNRE KEPEKVP FRITRML VKAMEVSGI EGNFRSTCE NVMQVLR TNKD SVMAMMEAFVH 2303
*****

Gm10 Ra  DPLI NWRLFNENE VP QMSMLTSN---HVPP VVNSEE---SAPNREL DHPQRGARE RELLQF 2374
Gm10 Fb  DPLI NWRLFNENE VP QMSMLTSN---HVPP VVNSEE---SAPNREL DHPQRGARE RELLQF 2374
At10 R   DPLI NWRLFNENE VP QMSMLTSN---HVPP VVNSEE---SAPNREL DHPQRGARE RELLQF 2363
*****

Gm10 Ra  VNQLGD ANEVLNE RA VVVMARM SNKLTGR DE STCSSVSNSSPQHA VD HS SLI SCDTREV 2432
Gm10 Fb  VNQLGD ANEVLNE RA VVVMARM SNKLTGR DE STCSSVSNSSPQHA VD HS SLI SCDTREV 2432
At10 R   VNQLGD ANEVLNE RA VVVMARM SNKLTGR DE STCSSVSNSSPQHA VD HS SLI SCDTREV 2417
*****

Gm10 Ra  HRLS VKLQVQKLI IQASHE NL CQNYVGVCP EW 2468
Gm10 Fb  HRLS VKLQVQKLI IQASHE NL CQNYVGVCP EW 2468
At10 R   HRLS VKLQVQKLI IQASHE NL CQNYVGVCP EW 2453
*****

```

Um *et al.*, Supplementary Figure 2

```

GmS6 K1a  FEELKVVGQGAERKUYQVRKNEFS ELYAMKVMRKDKIMKKNHAEYMKAEERDILT KIDHPF 209
GmS6 K1b  FEELKVVGQGAERKUYQVRKNEFS ELYAMKVMRKDKIMKKNHAEYMKAEERDILT KIDHPF 209
GmS6 K1c  FEELKVVGQGAERKUYQVRKNEFS ELYAMKVMRKDKIMKKNHAEYMKAEERDILT KIDHPF 209
At S6 K1   FEELKVVGQGAERKUYQVRKNEFS ELYAMKVMRKDKIMKKNHAEYMKAEERDILT KIDHPF 193
**      * * * * * * * * * * * * * * * * * * * * * * * * * * * * * * * * * *

GmS6 K1a  VVQLRYSEQTKYR LYLVLDFVNGGHLEFQ LYHQGLFRE DLARTYT AEIVCAVSHLHANGI 269
GmS6 K1b  VVQLRYSEQTKYR LYLVLDFVNGGHLEFQ LYHQGLFRE DLARTYT AEIVSAVSHLHANGI 269
GmS6 K1c  VVQLRYSEQTKYR LYLVLDFVNGGHLEFQ LYHQGLFRE DLARTYT AEIVCAVSHLHANGI 269
At S6 K1   IVQLRYSEQTKYR LYLVLDFVNGGHLEFQ LYHQGLFRE DLARTYT AEIVSAVSHLHANGI 253
*      * * * * * * * * * * * * * * * * * * * * * * * * * * * * * * * * * *

GmS6 K1a  MHRDLKPENILLD ADGHVMLTD EGLAKQF EE STRSNMCGTLEYMAP EITLGRGHDKARD 329
GmS6 K1b  MHRDLKPENILLD ADGHVMLTD EGLAKQF EE STRSNMCGTLEYMAP EITLGRGHDKARD 329
GmS6 K1c  MHRDLKPENILLD ADGHVMLTD EGLAKQF EE STRSNMCGTLEYMAP EITLGRGHDKARD 329
At S6 K1   MHRDLKPENILLD ADGHVMLTD EGLAKQF EE STRSNMCGTLEYMAP EITLGRGHDKARD 313
***** * * * * * * * * * * * * * * * * * * * * * * * * * * * * * * * * * *

GmS6 K1a  WWSVGLLLYEMLT GKPPFCGGRDKIQOKIVKDKIKLP AFLSSEAHSLKGLLQKEPERR 389
GmS6 K1b  WWSVGLLLYEMLT GKPPFCGGRDKIQOKIVKDKIKLP AFLSSEAHSLKGLLQKEPERR 389
GmS6 K1c  WWSVGLLLYEMLT GKPPFCGGRDKIQOKIVKDKIKLP AFLSSEAHSLKGLLQKEPERR 389
At S6 K1   WWSVGLLLYEMLT GKPPFCGGRDKIQOKIVKDKIKLP AFLSSEAHSLKGLLQKEPERR 372
***** * * * * * * * * * * * * * * * * * * * * * * * * * * * * * * * * * *

GmS6 K1a  LGCGRGVVEETKSHKWEKPI NQKLEARE IQPSRPEVAGVQCVA NE EKRWTDMPVVDSF 449
GmS6 K1b  LGCGRGVVEETKSHKWEKPI NQKLEARE IQPSRPEVAGVQCVA NE EKRWTDMPVVDSF 449
GmS6 K1c  LGCGRGVVEETKSHKWEKPI NQKLEARE IQPSRPEVAGVQCVA NE EKRWTDMPVVDSF 449
At S6 K1   LGCGRGVVEETKSHKWEKPI NQKLEARE IQPSRPEVAGVQCVA NE EKRWTDMPVVDSF 432
**      * * * * * * * * * * * * * * * * * * * * * * * * * * * * * * * * * *

GmS6 K1a  RASPNG 455
GmS6 K1b  RASPNG 455
GmS6 K1c  RASPNG 455
At S6 K1   RASPSS 438
*      * *

```

Um *et al.*, Supplementary Figure 3

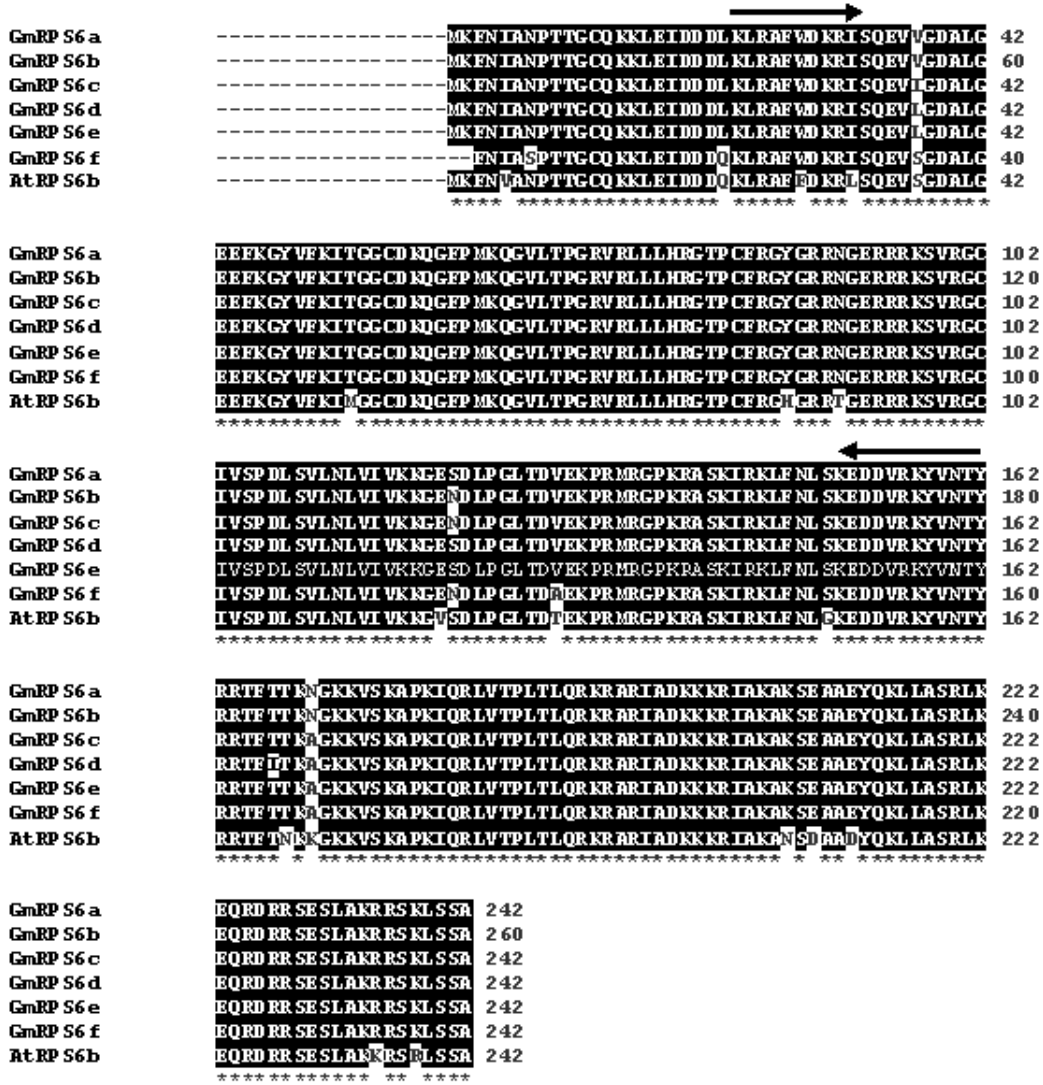

Um *et al.*, Supplementary Figure 4

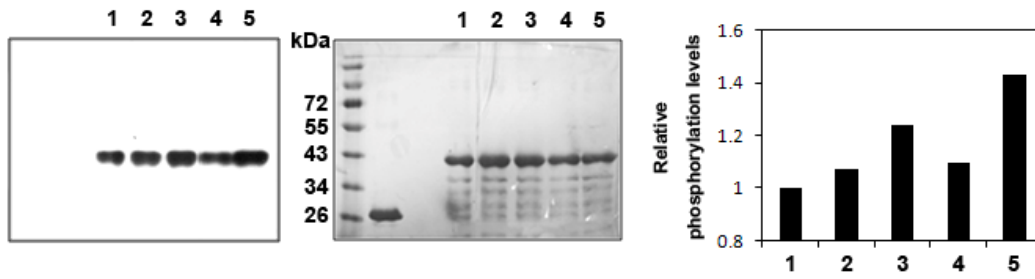

## Um *et al.*, Supplementary Figure 5

### Spot #1,3: cytosolic glutamine synthetase GSbeta1 [Glycine max]

|     |                    |                   |                    |                   |                   |
|-----|--------------------|-------------------|--------------------|-------------------|-------------------|
| 1   | MSLLSDLINL         | NLSDTTEKVI        | <b>AEYIWIGGSG</b>  | <b>MDLRSKARTL</b> | <b>PGPVSDPSEL</b> |
| 51  | <b>PKWNYDGSST</b>  | GQAPGEDSEV        | ILYPQAIFRD         | PFRRGNNILV        | ICDAYTPAGE        |
| 101 | PIPTNKRHAA         | AKVFSHPDVV        | AEVPWYGIEQ         | EYTLLQKDIQ        | WPLGWPVGGF        |
| 151 | PGPQGPYYCG         | VGADKAFGRD        | IVDAHYKACI         | YAGINISGIN        | GEVMPGQWEF        |
| 201 | QVGPSVGISA         | GDEIWAARYI        | LER <b>ITEIAGV</b> | <b>VVSFDPKPIK</b> | GDWNGAGAHT        |
| 251 | NYSTK <b>SMRED</b> | <b>GGYEVIKAAI</b> | DKLGKKHKEH         | IAAYGEGNER        | RLTGRHETAD        |
| 301 | INTFLWGVAN         | RGASVRVGRD        | TEKAGKGYFE         | DRRPASNMDP        | YVVTSMIADT        |
| 351 | TILWKP             |                   |                    |                   |                   |

### Spot #2: cytosolic glutamine synthetase beta2 [Glycine max]

|     |                    |                   |                     |                   |                   |
|-----|--------------------|-------------------|---------------------|-------------------|-------------------|
| 1   | MSLLSDLINL         | NLSDTTEKVI        | AEYIWIGGSG          | <b>MDLRSKARTL</b> | <b>PGPVSDPSKL</b> |
| 51  | <b>PKWNYDGSST</b>  | <b>GQAPGEDSEV</b> | <b>LIYPQAIFRD</b>   | PFRRGNNILV        | ICDITYTPAGE       |
| 101 | PIPTNKRHDA         | AKVFSHPDVV        | AEETWYGIEQ          | EYTLLQKDIQ        | WPLGWPVGGF        |
| 151 | PGPQGPYYCG         | VGADKAFGRD        | <b>IVDAHYKACL</b>   | YAGINISGIN        | GEVMPGQWEF        |
| 201 | QVGPSVGISA         | GDEVWAARYI        | LER <b>IIIEIAGV</b> | VVSFDPKPIQ        | GDWNGAGAHT        |
| 251 | NYSTK <b>SMRND</b> | <b>GGYEVIKTAI</b> | EKLGKRHKEH          | IAAYGEGNER        | RLTGRHETAD        |
| 301 | INTFLWGVAN         | RGASVRVGRD        | TEKAGKGYFE          | DRRPASNMDP        | YVVTSMIADT        |
| 351 | TILWKP             |                   |                     |                   |                   |

### Spot #4,5: heat shock protein 90-2 [Glycine max]

|     |                    |                   |                   |                    |                   |
|-----|--------------------|-------------------|-------------------|--------------------|-------------------|
| 1   | MASETETFAF         | QAEINQLLSL        | IINTFYNSKE        | IFL <b>RELISNA</b> | <b>SDALDKIRFE</b> |
| 51  | <b>SLTDKSKLDA</b>  | QPELFIHIIP        | DKTNNTLSII        | DSGIGMTKAD         | LVNNLGTIAR        |
| 101 | SGTKEFMEAL         | AAGADVSMIG        | QFGVGFYSAY        | LVADKIVVTT         | KHNDDEQYVW        |
| 151 | ESHAGGSFTV         | TRDTSGENLG        | RGTKITLFLK        | EDQLEYLEER         | RLKDLIKHS         |
| 201 | EFISYPISLW         | IEKTTEKEIS        | DDEDEEEKKD        | EEGKVEDVDE         | DKEKEEKKKK        |
| 251 | TI <b>KEVSHEWS</b> | <b>LVNKQKPIWM</b> | <b>RKPEEITKEE</b> | <b>YAAFYKSLTN</b>  | <b>DWEEHLAVKH</b> |
| 301 | <b>FSVEGQLEFK</b>  | AVLFIKRAP         | FDLFDTKKKP        | NNIKLYVRRV         | FIMDNCEELM        |
| 351 | PEYLSFVKGI         | VDSEDLPLNI        | SREMLQQNKI        | LKVIRKNLVK         | KCIEMFFEIA        |
| 401 | ENKEDYNKFY         | EAFSKNLKLG        | IHEDSQNKTK        | LAELLYRHST         | KSGDEMTSLK        |
| 451 | DYVTRMKEGQ         | NDIYYITGES        | KKAVENSPFL        | EKLKKKGFEV         | LYMVDAIDY         |
| 501 | AVGQLKEFEG         | KKLVSATKEG        | LKLDESEDEK        | KKKEELKEKF         | EGLCHVIKDV        |
| 551 | LGDKVEKVVV         | SDRVVDSPPC        | LVTGEYGWTA        | NMERIMKAQA         | LRDSSMAGYM        |
| 601 | SSKKTMEINP         | ENPIMEELRK        | RADADKNDKS        | VKDLVLLLF          | TALLTSGFSL        |
| 651 | DDPNTFGNRI         | HRMLKLGLSI        | DEDAGEADAD        | MPPLEDADAD         | AEGSKMEEVD        |

Spot #6: early-responsive to dehydration 2 [*Arabidopsis halleri* subsp.]

1 MAGKGEGPAI GIDLGTYSYSC VGVWQHDRV E I IANDQGNRT TPSYVAFTDS  
51 ERLIGDAAKN QVAMNPVNTV FDAKRLIGRI FSNASVQSDM KLWPFKIIPG  
101 QEDKPMILVN YKGEEKQFAA EEISSMVLVK MREIAEAYLG SSIKNAVVTV  
151 PAYFNDSQRQ ATKDAGVIAG LNVLRIINEP TAAAIAYGLD KKATSVGNKN  
201 VLIFDLGGGT FDVSLLTIEE GIFEVKATAG DTHLGGEDFD NRMVNHVQVE  
251 FKRKNKKDIS GNPRALRRLR TACERAKRTL SSTAQTTEIEV DSLFEGIDFY  
301 SPITRARFEE MNMDLFRKCM EPVEKCLRDA **NMNKNTIHDV** **VLVGGSTRIP**  
351 **KVQQLLQNF** **NGKELCKSIN** **PDEAVAYGAA** **VQAALLSGEG** **NEKVQDLLLL**  
401 DVTPLSLGIE TVGGVMTTLI QRNTTIPTKK EQVFTTNADN QPGVLIQVYE  
451 GERARTKDNN ILGKFELSGI PPAPRGVPQF TVCFDIDSNG IILNVAEDMA  
501 TGKKNKITIT NGKGRLSKDD IEKMQDAEK YKYEDEEHKK NVEAKNRLEN  
551 YAYNMRNTIC DIGDKLPAVD KKKIEDSIEE AMQWLDGNQL AEAEDEFEDKM  
601 KELESVYNPI ITKMYQGGMD EE

Spot #7: putative TCP-1/cpn60 chaperonin family protein (ISS) [*Ostreococcus tauri*]

1 XXRLASFVGA MAIGDLVKST LGPKGMDKIL QSVQKGRQVT VTNDGATILK  
51 SIYVDNPAAK VLVDISKAQD DEVGDGTTSV VVFASELLRQ AEQLVAQHVH  
101 PMTIIQGFRE ACEAAKAALE ETARDNAGSK EKFEEDLMNI AKTTLSSKIL  
151 THDKHEHFARL **AVDAVLR**LKG SGDLEMIQVI QKPGGNLKDS FLDEGFILDK  
201 RFGVGVQPKRI ENAKILIAN T PMDTDKIKIY GARVVRVDSMA KVADIEQAER  
251 EKMKRKCEKI IGYGINCFIN RQLIYNYPEQ IFTEAGVAAI EHADF DGIER  
301 LALVTGGDIC STFDNPEVDQ LGGCDLIEEI MIGEDRLIRF SGVAKGEACT  
351 IVLRGASEHI LGEAERSLHD ALCVLTSTVK DSRVIYGGGC SEMIMSKAVE  
401 ELAAKTPGKR SLAMECFKA L **RAIPTIICD** **NAGLDSADIV** **SQMR**AAHAEG  
451 DKKAGVNVLT GEVGDMMQCG VVECFRVKQQ VLLSATEAAE MIIRVDDIIK  
501 STPRQRE

Spot #8: glyceraldehyde-3-phosphate dehydrogenase [*Glycine max*]

1 MGKVKIGING FGRIGRLVAR VALQRDDVEL VAVNDPFITT DYMTYMFKYD  
51 SVHGHWKHHD VTKVDEK**TLL** **FGDKPVTIFG** **HRNPEEIPWG** STGADIIVES  
101 TGVFTDKDKA AAHLKGGAKK **VIISAPSKDA** PMFVVG VNEH EYKPELDIIS  
151 NASCTTNCLA PLAKVINDRF **GIVEGLMTTV** **HSITATQKT**TV DGPSAKDWRG  
201 **GRAASFNIIP** **SSTGA**AKAVG **KVLPALNGKL** TGMAFR**VPTV** **DVSVVDLTVR**  
251 LEKEASYDEI KNAIKEESEG KLKGILGYTE DDVVSTDFIG DSRSSIFDAK  
301 AGIALNKNFV KLVSWYDNEW GYSSRVIDLL VVFAKKS L

Spot #9: putative auxin efflux carrier [Zea mays]

|     |            |            |            |             |             |
|-----|------------|------------|------------|-------------|-------------|
| 1   | MITGTDFYHV | MTAMVPLYVA | MILAYGSRVW | WRIFTPDQCS  | GINRFVALFA  |
| 51  | VPLLSFHFI  | TNNPYTMNIR | FIAADTLQKL | IVLALLTAW   | YLSRRGCLEW  |
| 101 | TITLFSLSL  | PNTLVMGIP  | LKGMYGDFSG | SLMVQIVVLQ  | CIIWYTLMLF  |
| 151 | MFEYRGARIL | ITEQFPDTAG | AIASIVVDPD | VVSLDGRNDA  | IETEAEVKED  |
| 201 | GKIHVTVRRS | NASRSDIYSR | RSMGFSSTTP | RPSNLTNAEI  | YSLQSSRNPT  |
| 251 | PRGSSFNHTD | FYSMVGRSSN | FAAGDAFGLR | TGATPRPSNY  | EEDPQ GKANK |
| 301 | YGQYPAPNPA | MAAQPAKGLK | KAANGQAKGE | DGKDLHMFVW  | SSSASPVS DV |
| 351 | FGNGAAEYND | AAAVKEVRMA | VASPRKVAAD | GRKERGEDFA  | ERDDFSFGNR  |
| 401 | GAAERDAEAG | DEKAAAAAA  | AQGNAGAVAA | PAAMPPTSVM  | TRLILIMVWR  |
| 451 | KLIRNPNTYS | SLIGLIWSLV | CFRWNFEMPA | IILKISISILS | DAGLGMAMFS  |
| 501 | LGLFMALQPR | IIACGNKVAT | FAMAVRFLTG | PAVMAAASFA  | VGLRGTL LHV |
| 551 | AIVQAALPQG | IVPFVFAKEY | GVHPDILSTA | VIFGMLIALP  | ITLVYYILMG  |
| 601 | L          |            |            |             |             |

Um *et al.*, Supplementary Figure 6

A. Spot #6: early-responsive to dehydration 2, identity: 92% (60/65)

```

AhHsp70      DFNENENTLIDVVLVGGSTRI PKVQQLIQEENCKELCKSINPD EAVYGARVQRAILSG
Gm18g52610  DEKMDISSTVLDVVLVGGSTRI PKVQQLIQEENCKELCKSINPD EAVYGARVQRAILSG
*****

AhHsp70      EGNEK
Gm18g52610  EGNEK
*****
    
```

B. Spot #7: putative TCP-1/cpn60 chaperonin family protein, identity: 80% (25/31)

```

OsTCP-1      LAVDRAVLR-----RIPITLIDNAGLDSRDI VSQMR
Gm12g09250  LAVDRAVLR-----RIPITLIDNAGLDSRELISQLR
***** **
    
```

C. Spot #9: putative auxin efflux carrier, identity: 69% (22/32)

```

ZmPIN      RARRAAAGQCNRGAVADRRAMPPT SVMTRLLILM VWR
Gm19g30900 -RELHPKQCE S----RPTSMPT SVMTRLLILM VWR
*      ***      *      *****
    
```
